# Supplementary material for: Carboxylic acid terminated monolayer formation on crystalline silicon and silicon nitride surfaces. A surface coverage determination with a fluorescent probe in solutionElectronic Supplementary Information (ESI) available: analytical data of the new compounds and general information on the instruments used for their characterization. See http://www.rsc.org/suppdata/jm/b3/b312273e/
Source: Royal Society of Chemistry journal article supplement (doi:10.1039/b312273e), 2004-01-01
Supplement: b312273e.doc [file b312273e.doc]

**Electronic Supplementary Information**

for the manuscript:

**"Carboxylic acid terminated monolayer formation on crystalline silicon and silicon nitride surfaces. A surface coverage determination with a fluorescent probe in solution"**

by Fabrizio Cattaruzza, Antonio Cricenti, Alberto Flamini, Marco Girasole, Gianni Longo,Alessio Mezzi and Tommaso Prosperi

List of the material enclosed:

**Experimental:** General Information on the instruments used for the characterisation of the new compounds and analytical data of the amides **4**, **5**, **4'**, **5'** : crystal morphology, formation reaction yield, mp (°C), elemental analysis, 1H-NMR (/ppm), IR (/cm-1).

**Experimental**

*General* - The mp’s were determined with a Büchi SMP-20 model melting point apparatus. Elemental analyses were by Servizio Microanalisi of CNR, Area della Ricerca di Roma. IR measurements were performed with a Perkin-Elmer 16F PC FT spectrometer on KBr pellets (0.75% w/w); the stretching frequencies (/cm-1) of the absorption maximum of the most significant bands are given. The 1H-NMR spectra were obtained in CDCl3 and CD3CN solution with a Bruker AMX-250 spectrometer. The chemical shifts (/ppm) were referred to the residual CHCl3 proton (singlet, 7.26 ppm) of CDCl3 or the CHD2CN proton (quintet, 1.97 ppm) of CD3CN. The J-values are given in Hz.

*Analytical data of the new compounds*

*12-Bromo-dodecanoic acid(4-methylcoumarin-7-yl)-amide* (**4**)– White microcrystalline powder, yield 32%, mp 161-163 °C. Analysis found: C 63.24, H 7.35, N 3.31; C22H30BrNO3 requires: C 63.13, H 7.17, N 3.35; H 7.80 (1H, d, J 2.03, Ph), 7.66 (1H, dd, J 2.03-8.82, Ph), 7.52 (1H, dd, J 2.03-8.82, Ph), 6.24 (1H, s, CHC=C), 3.43 (2.0 H, t, J 6.8, CH2Br), 2.45 (3H, s, CH3), 2.44 (2H, t, J 6.8, CH2CO), 1.3-1.9 (18H, m br, CH2); max 3298 (s, br, H-N), 2926 and 2853 (s, H-C), 1687 (vs, br, CO).

*Undec-10-ynoic acid(4-methylcoumarin-7-yl)-amide* (**5**)– White microcrystalline powder, yield 38%, mp 167-169 °C. Analysis found: C 74.07, H 7.54, N 4.17; C21H25NO3 requires: C 74.31, H 7.42, N 4.13; H 7.81 (1 H, d, J 1.84, Ph), 7.64 (1 H, s, Ph), 7.57 (1 H, d, J 1.84, Ph), 6.23 (1 H, s, CHC=C), 2.46 (2 H, t, J 6.8, CH2CO), 2.45 (3 H, s, CH3), 2.21 (2 H, dt, J 2.4-6.8, CHCCH2), 1.96 (1 H, t, J 2.4, CHC), 1.3-1.8 (12 H, m br, CH2); max 3295 (s, H-N), 3256 (s, H-CC) 2925 and 2850 (s, H-CH2), 1687 (vs, br, CO); the assignment of the band at 3295 and 3256 cm-1 to the H-N and H-CC stretching vibration, respectively, is based on the deuteration of the amide group (H-N  D-N, recrystallizing **5** from THF/D2O), after which the band at 3295 cm-1 disappears and a new band appears at 2435 cm-1 (s, D-N).

*12-Bromo-dodecanoic acid(4-trifluoromethylcoumarin-7-yl)-amide* (**4'**)– Yellow microcrystalline powder, yield 40%, mp 102-103 °C. Analysis found: C 54.50, H 5.72, N 2.90; C22H27BrF3NO3 requires: C 53.89, H 5.56, N 2.85; H 7.83 (1H, d, J 2.03, Ph), 7.69 (1H, dd, J 2.03-8.82, Ph), 7.54 (1H, dd, J 2.03-8.82, Ph), 6.61 (1H, s, CHC=C), 3.43 (1.8 H, t, J 6.8, CH2Br), 2.45 (2H, t, J 7.8, CH2CO), 1.3-1.9 (18H, m br, CH2); max 3348 (s, br, H-N), 2931 and 2849 (s, H-C), 1735 and 1702 (vs, CO), 1136 (s, C-F).

*Undec-10-ynoic acid(4-trifluoromethylcoumarin-7-yl)-amide* (**5'**)- Yellow microcrystalline powder, yield 24%, mp 114-115 °C. Analysis found: C 63.42, H 5.85, N 3.61; C21H22F3NO3 requires: C 64.10, H 5.60, N 3.60; H 7.79 (d, J 2.03, Ph), 7.66 (dd, J 2.03-8.82, Ph), 7.52 (dd, J 2.03-8.82, Ph), 6.69 (1 H, s, CHC=C), 2.42 (2 H, t, J 7.46, CH2CO), 2.28 (2 H, dt, J 2.38-7.12, CHCCH2), 1.93 (1 H, t, J 2.38, CHC), 1.3-1.8 (12 H, m br, CH2); max 3355 (s, H-N), 3286 (s, H-CC), 2929 and 2855 (s, H-CH2), 1706 (vs, br, CO), 1145 (s, C-F). As in the case of **5**, the assignment of H-N and H-CC stretching vibration is based on the deuteration experiment, from which it results that H-N stretching shifts to 2478 cm-1 (s, D-N).
